# Supplementary material
Source: PubMed Central journal article supplement (PMC2667725)
Supplement: M808894200_1.pdf [file M808894200_1.pdf]

## Supplemental data

### A

| Protein |   |   | Mph1 |    | Pfh1 |    | T-antigen |    | Mph1 |    | Pfh1 |    | T-antigen |    |
|---------|---|---|------|----|------|----|-----------|----|------|----|------|----|-----------|----|
|         | - | + | +    | ++ | +    | ++ | +         | ++ | +    | ++ | +    | ++ | +         | ++ |
| Fen1    | - | + | +    | +  | +    | +  | +         | +  | -    | -  | -    | -  | -         | -  |
| Lanes   | 1 | 2 | 3    | 4  | 5    | 6  | 7         | 8  | 9    | 10 | 11   | 12 | 13        | 14 |

0.5 3.1 9.1 0.6 0.8 0.6 0.6

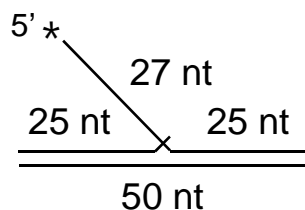

### B

| Protein |   |   | Mph1 |    | Pfh1 |    | T-antigen |    | Mph1 |    | Pfh1 |    | T-antigen |    |
|---------|---|---|------|----|------|----|-----------|----|------|----|------|----|-----------|----|
|         | - | + | +    | ++ | +    | ++ | +         | ++ | +    | ++ | +    | ++ | +         | ++ |
| Dna2    | - | + | +    | +  | +    | +  | +         | +  | -    | -  | -    | -  | -         | -  |
| Lanes   | 1 | 2 | 3    | 4  | 5    | 6  | 7         | 8  | 9    | 10 | 11   | 12 | 13        | 14 |

0.7 1.6 3.8 0.7 0.7 0.8 0.6

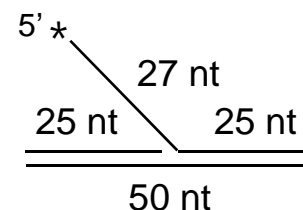

**Figure S1. Specificity of *S. cerevisiae* Mph1 in stimulation of Fen1 and Dna2** **A**, Fen1 endonuclease assay was performed in standard reaction condition at 30°C for 15 min. Fen1(8 fmol) was added (+) or omitted (-). Mph1, as a stimulating factor, and two non-specific helicases, *S. pombe* Pfh1 and SV40 T-antigen were included (+: 10 fmol, ++: 32 fmol) or omitted (-) in reactions. **B**, Dna2 endonuclease assay was performed as in panel A. Dna2 (2 fmol) was added (+) or omitted (-). Mph1 and two non-specific helicases, *S. pombe* Pfh1 and SV40 T-antigen were included (+: 10 fmol, ++: 32 fmol) or omitted (-) in reactions. B : boiled substrate. The substrate used are illustrated below the panel.

**A**

|            |    |    |    |     |     |     |     |     |     |
|------------|----|----|----|-----|-----|-----|-----|-----|-----|
| Fen1(fmol) | B  | -  | 26 | 26  | 26  | 26  | 26  | 26  | 26  |
| NaCl (mM)  | 75 | 75 | 75 | 100 | 125 | 150 | 175 | 225 | 275 |
| Lanes      | 1  | 2  | 3  | 4   | 5   | 6   | 7   | 8   | 9   |

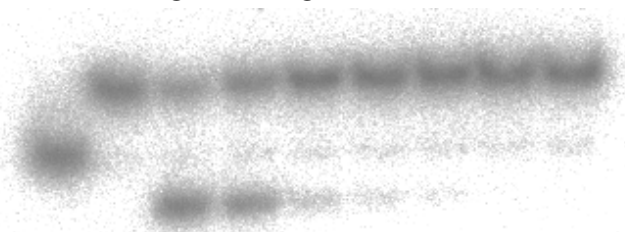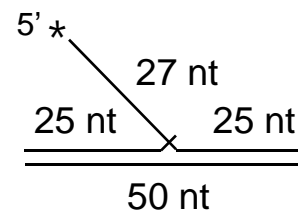**B**

|             |     |     |     |     |     |     |     |     |
|-------------|-----|-----|-----|-----|-----|-----|-----|-----|
| Mph1 (mM)   |     | -   | -   | -   | -   | 26  | 26  | 26  |
| Fen1 (fmol) | B   | -   | 26  | 26  | 26  | 26  | 26  | 26  |
| NaCl (mM)   | 125 | 125 | 125 | 150 | 175 | 125 | 150 | 175 |
| Lanes       | 1   | 2   | 3   | 4   | 5   | 6   | 7   | 8   |

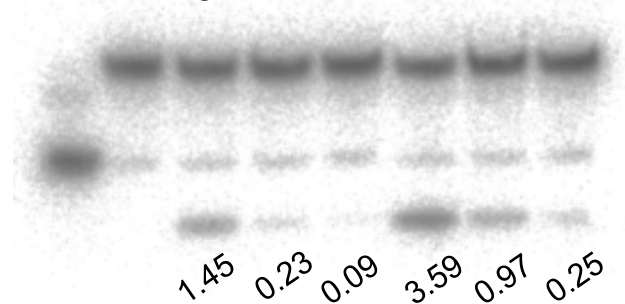

1.45 0.23 0.09 3.59 0.97 0.25

**Figure S2. Stimulation of higher amount of Fen1 in increased salt concentration by Mph1** **A**, Fen1 endonuclease assay was performed in various NaCl concentrations. Substrate used is illustrated on right side of the panel. **B**, Endonuclease assay was performed with Fen1 in higher concentration of NaCl (125~175 mM) in the presence or absence of Mph1. The amount of proteins used are indicated in the figure. B : boiled substrate.

**A**

|               |    |    |    |     |    |    |    |     |    |    |
|---------------|----|----|----|-----|----|----|----|-----|----|----|
| Time (sec)    | 10 | 30 | 90 | 240 | 10 | 30 | 90 | 240 |    |    |
| Mph1 (fmol)   | -  | -  | -  | -   | -  | 32 | 32 | 32  | 32 |    |
| Fen1 (fmol) B | -  | 26 | 26 | 26  | 26 | 26 | 26 | 26  | 26 |    |
| Lanes         | 1  | 2  | 3  | 4   | 5  | 6  | 7  | 8   | 9  | 10 |

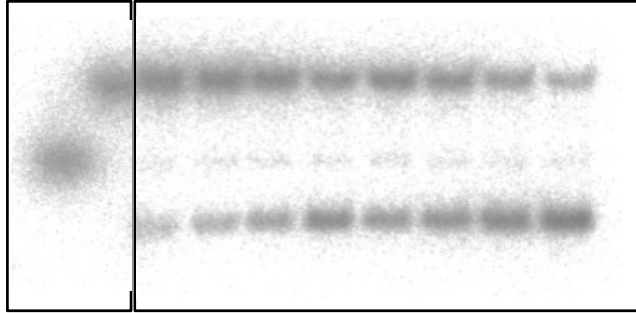**B**

|               |   |    |    |    |    |    |    |    |    |    |
|---------------|---|----|----|----|----|----|----|----|----|----|
| Time (sec)    | 2 | 5  | 15 | 30 | 2  | 5  | 15 | 30 |    |    |
| Mph1 (fmol)   | - | -  | -  | -  | -  | 32 | 32 | 32 | 32 |    |
| Dna2 (fmol) B | - | 15 | 15 | 15 | 15 | 15 | 15 | 15 | 15 |    |
| Lanes         | 1 | 2  | 3  | 4  | 5  | 6  | 7  | 8  | 9  | 10 |

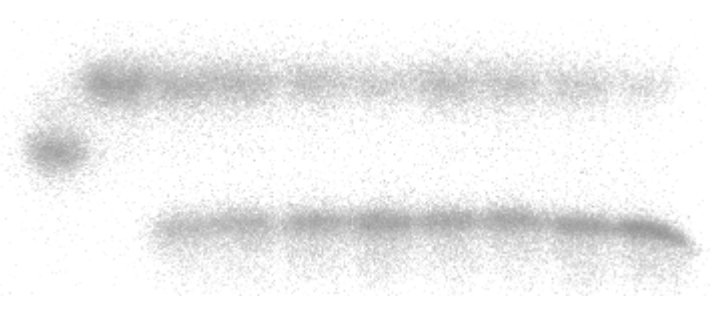**C**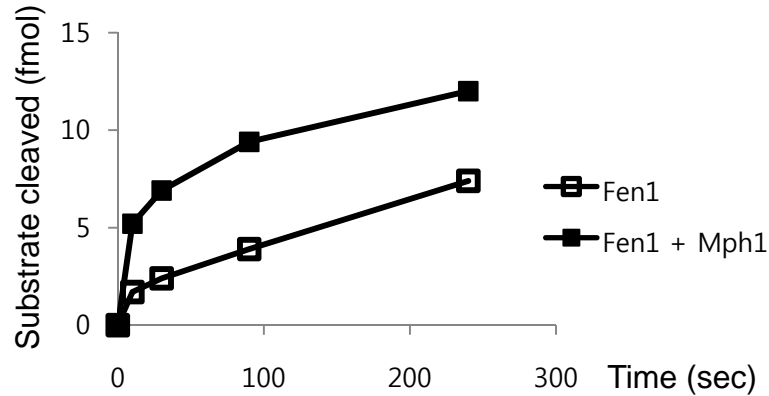**D**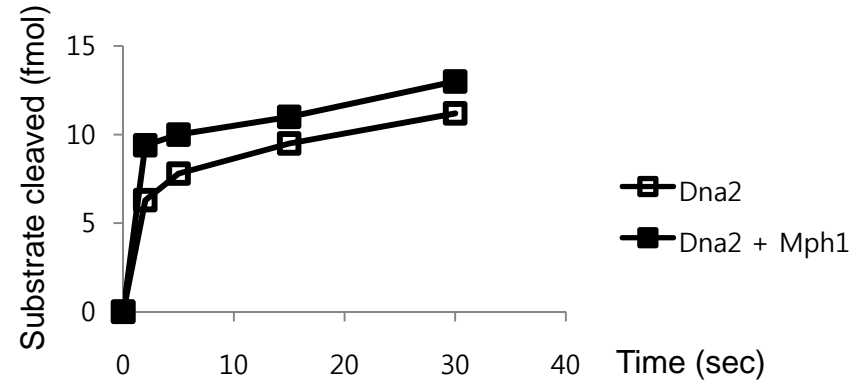

**Figure S3. Stimulation of higher amount of Fen1 and Dna2 by Mph1** **A**, Fen1 endonuclease assay was performed with time-course (10~240 sec) in the presence or absence of Mph1. All additions are indicated in the figure and substrate used is illustrated in figure S1. **A. B**, Dna2 endonuclease assay was performed with time-course (2~30 sec) in the presence or absence of Mph1. All additions are indicated in the figure and substrate used is illustrated in figure S1. **B. C**, The amount of endonucleolytic product in panel **A** was plotted against time. **D**, The amount of endonucleolytic product in panel **B** was plotted against time.
